# Supplementary material for: Gene and microRNA modulation upon trabectedin treatment in a human intrahepatic cholangiocarcinoma paired patient derived xenograft and cell line
Source: PubMed Central journal article supplement (PMC5349952; doi:10.18632/oncotarget.13575), 2016-11-24
Supplement: oncotarget-07-86766-s001.pdf [file oncotarget-07-86766-s001.pdf]

# Gene and microRNA modulation upon trabectedin treatment in a human intrahepatic cholangiocarcinoma paired patient derived xenograft and cell line

## SUPPLEMENTARY FIGURES AND TABLES

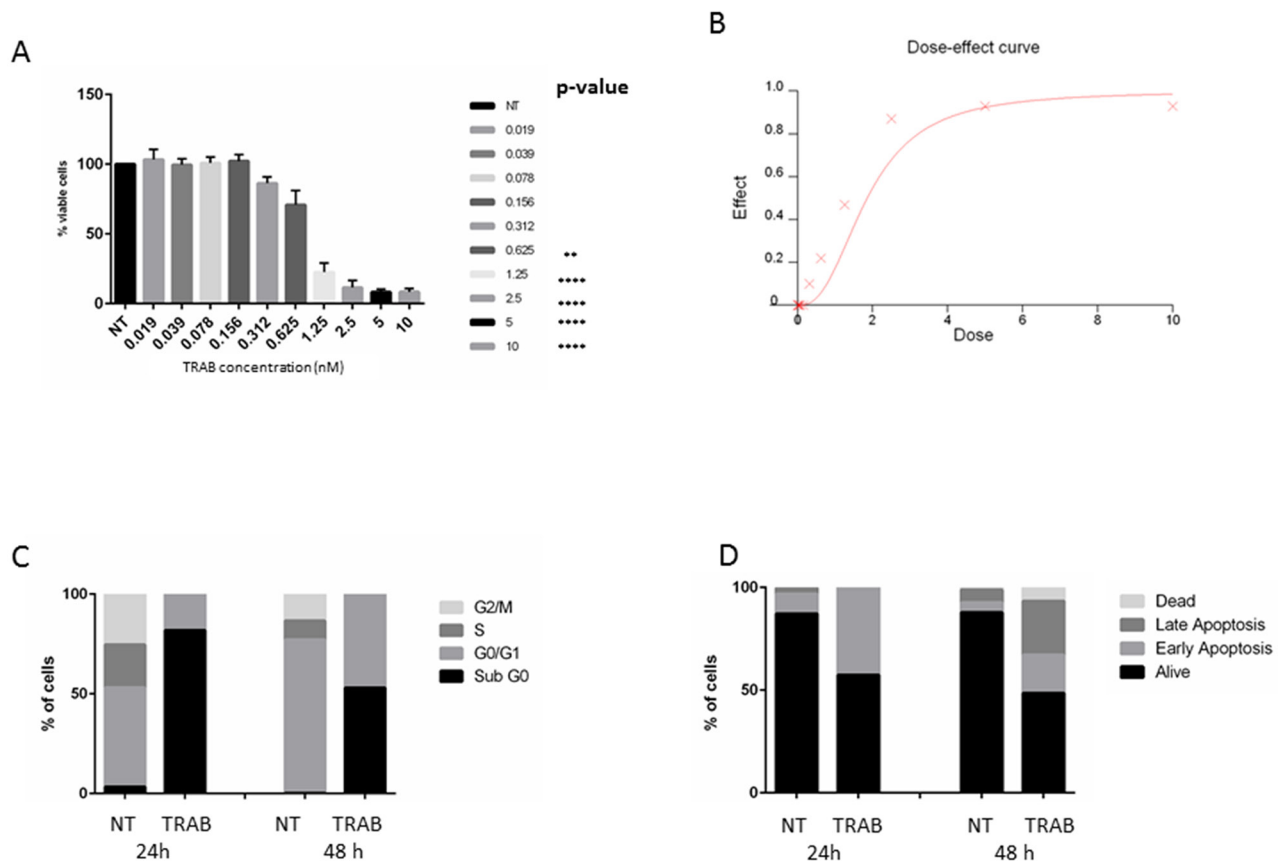

**Supplementary Figure S1: Effect of trabectedin on proliferation, cell cycle and apoptosis in MT-CHC01 cells. Panel A:** Statistical analysis of cell viability after 72 hours of treatment with escalating doses of trabectedin. A statistical significant reduction of proliferation was revealed until 0.625 nM. **Panel B:** Dose effect curve of trabectedin; the IC50 value is 1.84 nM. **Panels C-D:** Effect of trabectedin on cell cycle (C) and on apoptosis (D) *in vitro*. MT-CHC01 cells were treated with 5 nM of trabectedin for 24 and 48 h and subjected to cell cycle analysis and apoptosis detection by AnnexinV/PI staining by flow cytometry as described in methods. The bars represent the average with SEM of percentage of cells in each phase (C) and apoptotic cells (D) of three independent experiments. NT: not treated cells

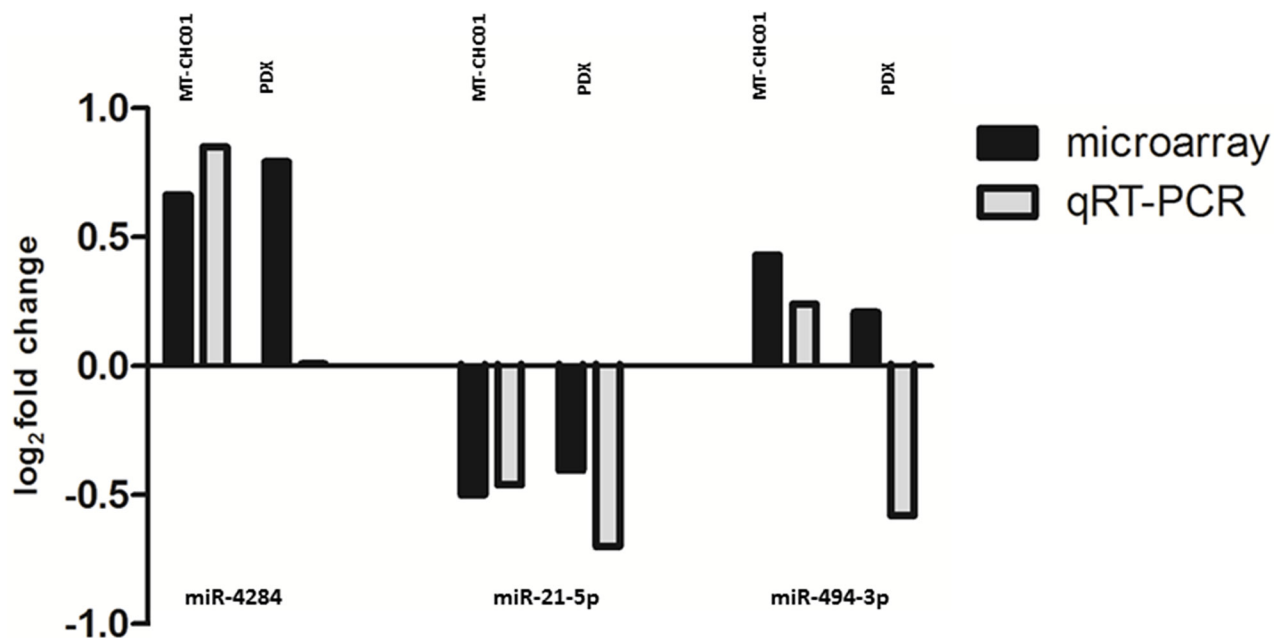

**Supplementary Figure S2: Comparison between the expression values of selected microRNAs obtained by array and qRT-PCR after trabectedin treatment.** X axis: gene expression of MT-CHC01 and PDX respectively. Y axis: log<sub>2</sub> fold change expression obtained by microarray and 2<sup>-ΔΔCt</sup> for qRT-PCR.

**Supplementary Table S1: Biological processes significantly enriched within down- and up- regulated probes after trabectedin treatment of MT-CHC01 cells.**

See Supplementary File 1

**Supplementary Table S2: Pathways enriched within down- and up-regulated genes (Kegg database) after trabectedin treatment of MT-CHC01 cells**

| Name                                   | p-value  | Expression upon trabectedin |
|----------------------------------------|----------|-----------------------------|
| Focal adhesion                         | 0.000001 | down                        |
| Fc gamma R-mediated phagocytosis       | 0.001    | down                        |
| Endocytosis                            | 0.001    | down                        |
| Regulation of actin cytoskeleton       | 0.003    | down                        |
| Tight junction                         | 0.009    | down                        |
| Glioma                                 | 0.01     | down                        |
| O-Glycan biosynthesis                  | 0.01     | down                        |
| Axon guidance                          | 0.01     | down                        |
| ErbB signaling pathway                 | 0.03     | down                        |
| Fc epsilon RI signaling pathway        | 0.04     | down                        |
| Adherens junction                      | 0.04     | down                        |
| Insulin signaling pathway              | 0.04     | down                        |
| Cytokine-cytokine receptor interaction | 0.01     | up                          |
| Pathways in cancer                     | 0.02     | up                          |
| p53 signaling pathway                  | 0.03     | up                          |

**Supplementary Table S3: Biological processes significantly enriched within down and up regulated probes after trabectedin treatment of PDX**

See Supplementary File 2

**Supplementary Table S4: Pathways enriched within down- and up-regulated genes (Kegg database) after trabectedin treatment of PDX**

| Name                                                   | p-value | Expression upon trabectedin |
|--------------------------------------------------------|---------|-----------------------------|
| Focal adhesion                                         | 0.001   | down                        |
| ECM-receptor interaction                               | 0.002   | down                        |
| Complement and coagulation cascades                    | 0.001   | down                        |
| Systemic lupus erythematosus                           | 0.004   | down                        |
| Basal cell carcinoma                                   | 0.008   | down                        |
| Arrhythmogenic right ventricular cardiomyopathy (ARVC) | 0.03    | down                        |
| Hedgehog signaling pathway                             | 0.04    | down                        |
| MAPK signaling pathway                                 | 0.02    | up                          |
| Inositol phosphate metabolism                          | 0.02    | up                          |
| Complement and coagulation cascades                    | 0.02    | up                          |

**Supplementary Table S5: Common deregulated genes between *in vitro* and *in vivo* models upon trabectedin treatment**

See Supplementary File 3

Supplementary Table S6: Differentially expressed microRNA upon trabectedin of MT-CHC01 cells

| miRNA           | logFC | Function                                                | PMID                             |
|-----------------|-------|---------------------------------------------------------|----------------------------------|
| hsa-miR-27b-3p  | -0.56 | 5-FU resistance                                         | 25356050                         |
| hsa-miR-28-3p   | -0.56 | Migration/invasion                                      | 22240480                         |
| hsa-miR-628-5p  | -0.55 | Sunitinib resistance                                    | 24475095                         |
| hsa-miR-21-3p   | -0.53 | BTC progression                                         | 24699315/ 23417858/<br>22213236  |
| hsa-miR-21-5p   | -0.50 | BTC progression                                         | 22213236                         |
| hsa-miR-210-3p  | -0.47 | Hypoxia                                                 | 24517586                         |
| hsa-miR-331-3p  | -0.44 | proliferation                                           | 24825302                         |
| hsa-miR-31-3p   | -0.44 | BTC progression                                         | 22213236                         |
| hsa-miR-27a-3p  | -0.42 | Hypoxia                                                 | 24517586                         |
| hsa-miR-200a-5p | -0.40 | Tumor progression                                       | 25275448                         |
| hsa-miR-151a-3p | -0.40 | No cancer related                                       |                                  |
| hsa-miR-29a-3p  | -0.39 | Marker for AML NCS<br>Prognostic marker in NSCLC        | 21678057<br>24898736<br>24928469 |
| hsa-miR-574-5p  | 0.39  | Marker in ESCC<br>Tumor suppressor in CRC<br>metastasis | 23124769<br>24936152             |
| hsa-miR-3162-5p | 0.39  | SCC progression marker                                  | 23799609                         |
| hsa-miR-1915-3p | 0.40  | Apoptosis                                               | 24814047/ 22121083               |
| hsa-miR-494-3p  | 0.43  | Proliferation/invasion                                  | 24644030                         |
| hsa-miR-3656    | 0.46  |                                                         |                                  |
| hsa-miR-3665    | 0.46  |                                                         |                                  |
| hsa-miR-1268a   | 0.57  |                                                         |                                  |
| hsa-miR-1207-5p | 0.61  | Tumor progression                                       | 24481448                         |
| hsa-miR-1225-5p | 0.66  | No cancer related                                       |                                  |
| hsa-miR-4284    | 0.67  | Apoptosis                                               | 24732116                         |
| hsa-miR-1246    | 0.71  | Cervical cancer progression                             | 24806621                         |
| hsa-miR-4281    | 0.79  | Melanoma marker                                         | 23111773                         |

Supplementary Table S7: Primers sequences for qRT-PCR validation

| Gene Name | Forward               | Reverse              |
|-----------|-----------------------|----------------------|
| CDH2      | CCAGTATCCGGTCCGATCTG  | ATAGTCCTGCTCACCACCAC |
| WNT7B     | GAAGGAGAAGTACAACGCGG  | ACACCAGGTCTGTCTCCATG |
| PMEPA1    | ACCATCTTCGACAGTGACCT  | GATGACCTCGCTGTAGGTGG |
| NAV2      | AGTTACGGCCTGAGGATGTC  | GTTGCTGTTGGAGTCGCTG  |
| ATF3      | TCGGAGAAGCTGGAAAGTGT  | TTCTGAGCCCGACAATACA  |
| NOV       | AGCTGTGGTATGGGGTTCTC  | AGGTGGATGGCTTTGAGTGA |
| CD68      | GCATCCCTTCGAGATCTCCA  | GCAGGAGAACTTTGCCCAA  |
| RASD1     | GCCAAGAAGAACAGCAGCC   | AGTACTGCACCGAGACCTTG |
| SYK       | AGCAAAAGCGATGTCTGGAG  | ATCTCTTTGGACACCCTGC  |
| LGALS1    | CTGTCTTCCCTTCCAGCCT   | GCGGTTGGGGAACCTGAATT |
| PGK       | AGCTGCTGGGTCTGTCATCCT | TGGCTCGGCTTTAACCTTGT |
